# Supplementary material for: Synthesis of amphiphilic block-type macromolecular brushes with cleavable pendant chains and fabrication of micelle-templated polymer nanocapsules
Source: Royal Society of Chemistry journal article supplement (doi:10.1039/c5py01940k), 2015-12-28
Supplement: c5py01940k1.pdf [file c5py01940k1.pdf]

## Supporting Information

### Synthesis of Amphiphilic Block-Type Macromolecular Brushes with cleavable Pendant Chains and Fabrication of Micelle- Templated Polymer Nanocapsules

Guangda Han, Yuanyuan Ju and Hanying Zhao

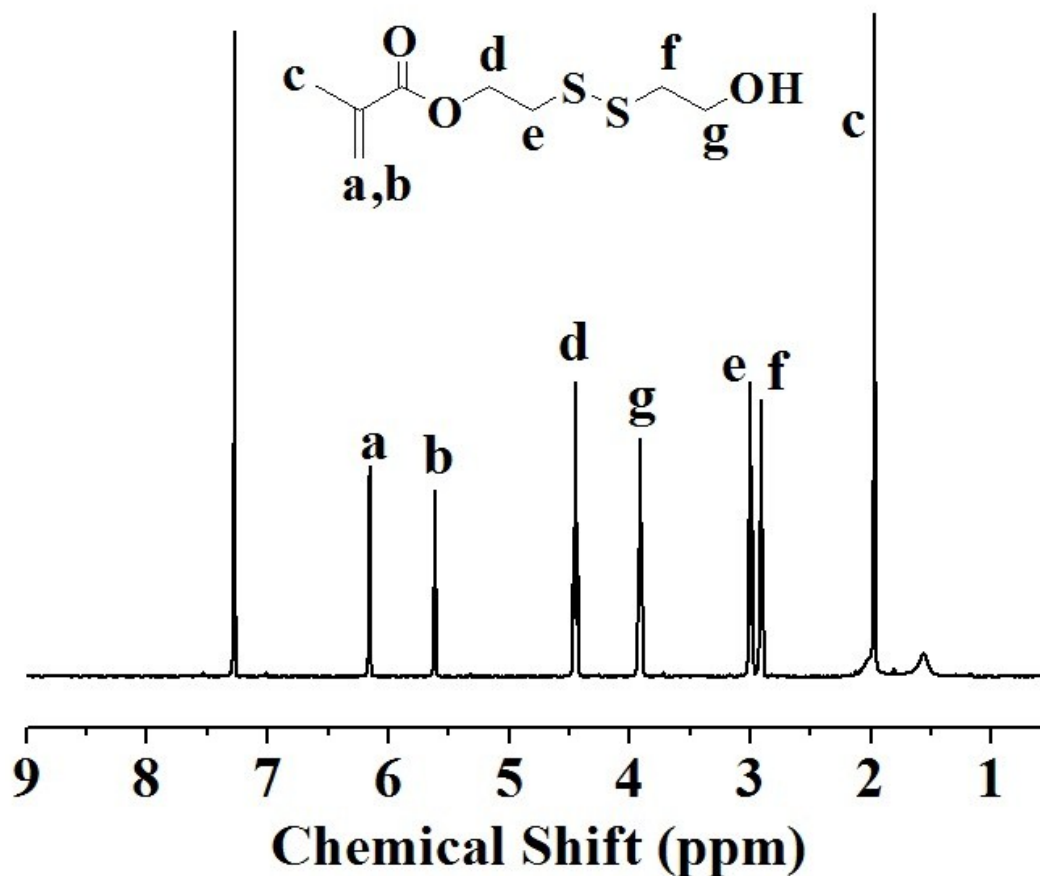

**Figures S1.** <sup>1</sup>H NMR spectrum of 2-(methacryloyl) oxyethyl-2'-hydroxyethyl disulfide (MAOHD).

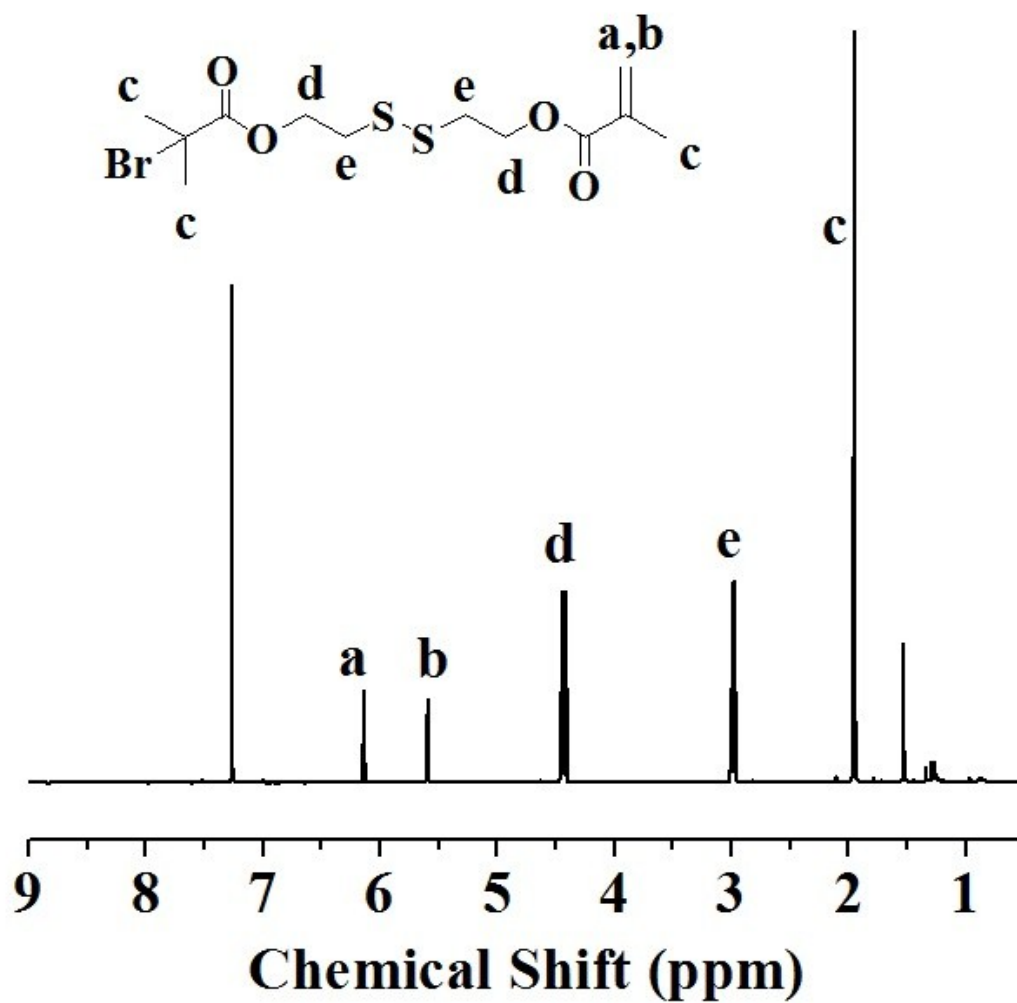

**Figures S2.** <sup>1</sup>H NMR spectrum of 2-(2'-bromoisobutyryloxy)ethyl 2''-Methacryloyloxyethyl disulfide (BiBOEMAD).

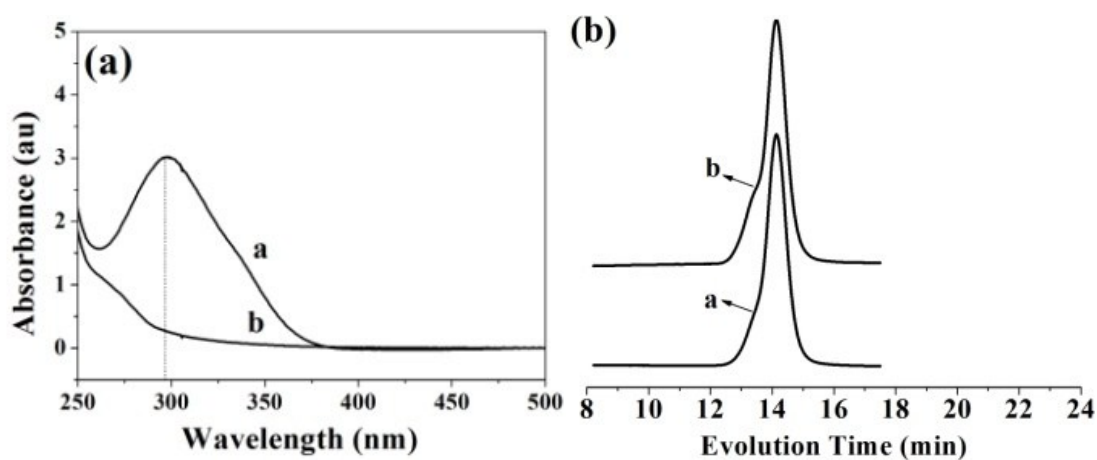

**Fig. S3.** (a) UV-vis spectra of POEGMA<sub>42</sub>-*b*-P(*t*BMA<sub>200</sub>-BiBOEMD<sub>7</sub>) block copolymer prepared by two-step RAFT polymerization (spectrum a) and the block

copolymer after treatment with AIBN (spectrum b). (b) GPC traces of POEGMA<sub>42</sub>-*b*-P(*t*BMA<sub>200</sub>-BiBOEMD<sub>7</sub>) block copolymer (curve a) and the block copolymer after treatment with AIBN (curve b).
